# Supplementary material for: Modification of 1D TiO2 nanowires with GaOxNy by atomic layer deposition for TiO2@GaOxNy core–shell nanowires with enhanced photoelectrochemical performance
Source: Royal Society of Chemistry journal article supplement (doi:10.1039/c9nr10908k), 2020-01-01
Supplement: c9nr10908k1.pdf [file c9nr10908k1.pdf]

## Supporting Information

### **Modification of 1D TiO<sub>2</sub> nanowires with GaO<sub>x</sub>N<sub>y</sub> by atomic layer deposition for TiO<sub>2</sub>@GaO<sub>x</sub>N<sub>y</sub> core-shell nanowires with enhanced photoelectrochemical performance**

Jia-Jia Tao<sup>‡,a</sup>, Hong-Ping Ma<sup>‡,a</sup>, Kaiping Yuan<sup>a</sup>, Yang Gu<sup>a</sup>, Jianwei Lian<sup>a</sup>, Xiao-Xi Li<sup>a</sup>, Wei Huang<sup>a</sup>, Michael Nolan<sup>b,\*</sup>, Hong-Liang Lu<sup>a,\*</sup> and David Wei Zhang<sup>a</sup>

<sup>a</sup> State Key Laboratory of ASIC and System, Shanghai Institute of Intelligent Electronics & Systems, School of Microelectronics, Fudan University, Shanghai 200433, China

<sup>b</sup> Tyndall National Institute, University College Cork, Lee Maltings, Dyke Parade, Cork T12 R5CP, Cork, Ireland

E-mail: Michael.nolan@tyndall.ie (M. Nolan), honglianglu@fudan.edu.cn (H-L Lu);

<sup>‡</sup>, These authors contributed equally

## Supplementary Figures

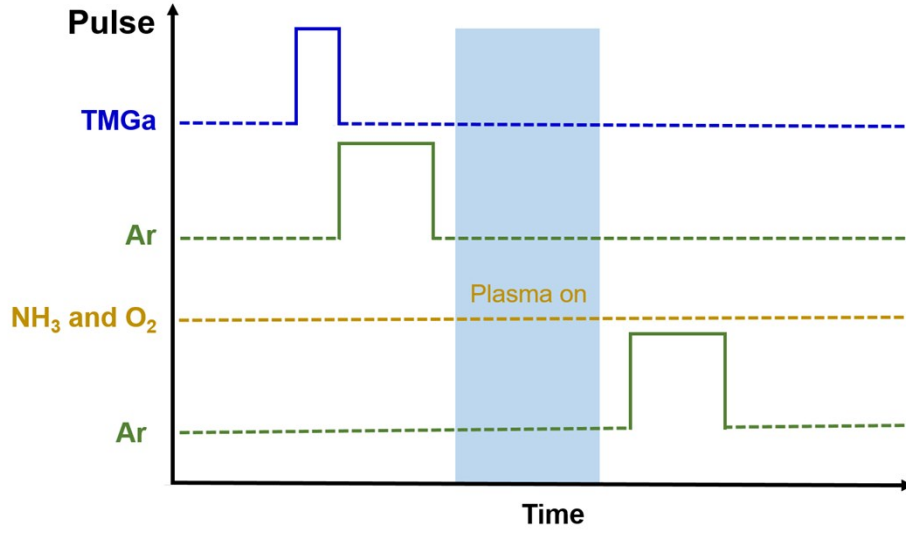

**Fig. S1** The schematic diagram of one ALD cycle of  $\text{GaO}_x\text{N}_y$  deposition.

A schematic diagram of one ALD cycle of  $\text{GaO}_x\text{N}_y$  deposition is shown in Fig. S1. Typically, one ALD cycle has four steps: pulse 1 - purge 1 - pulse 2 - purge 2. Accordingly, one ALD cycle for  $\text{GaO}_x\text{N}_y$  can be described as follows: TMGa pulse (15 ms) - Ar purge (10 s) - plasma processing (15 s) - Ar purge (10 s).

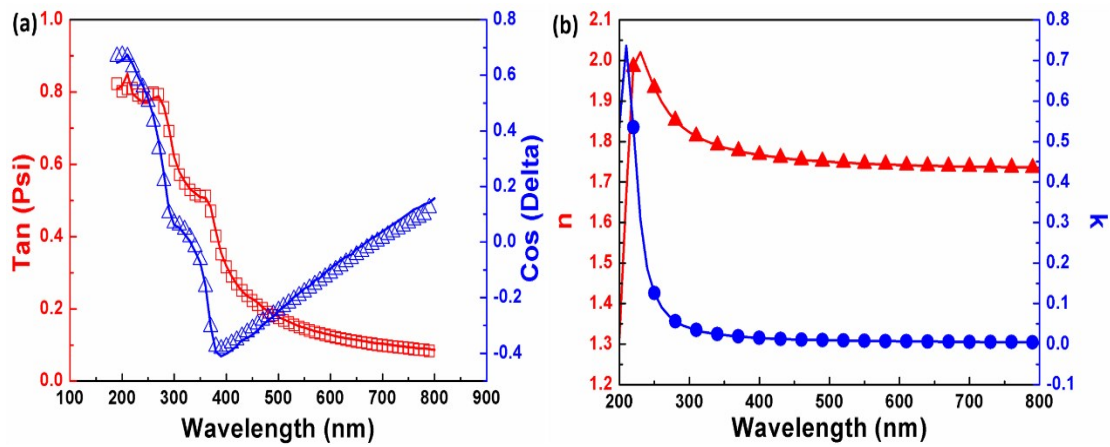

**Fig. S2** (a) Measured (symbol) and fitted (line) ellipsometric data and (b) optical constants of  $\text{GaO}_x\text{N}_y$  thin films with 200 ALD cycles deposited on a Si substrate.

The fitting results show a good agreement with the experimental data in the entire measured wavelength range with  $RMSE \approx 0.99$ . From the SE results, it can be concluded that the thickness is 9.12 nm, the refractive index value ( $n$ ) is 1.740, and the extinction coefficient ( $k$ ) is  $6.51 \times 10^{-3}$  at a wavelength of 632.8 nm for 200 ALD cycles of  $GaO_xN_y$  samples. The obtained film thickness is nearly unchanged and agrees well the measured SEM results (Manuscript), implying the accuracy and reliability of the ellipsometric fitting. The refractive index value  $n$  and extinction coefficient  $k$  decreases with the wavelength increase in the long range, which can be seen that our results agree well with the literature for PEALD growth of AZO thin films<sup>1</sup>.

#### **Notes and references**

1. T. Gu, E.T. Hu, S. Guo, Y. Wu, J. Wang, Z.Y. Wang, K.H. Yu, W. Wei, Y.X. Zheng, S.Y. Wang and L.Y. Chen, *Vacuum*, 2019, **163**,69-74.

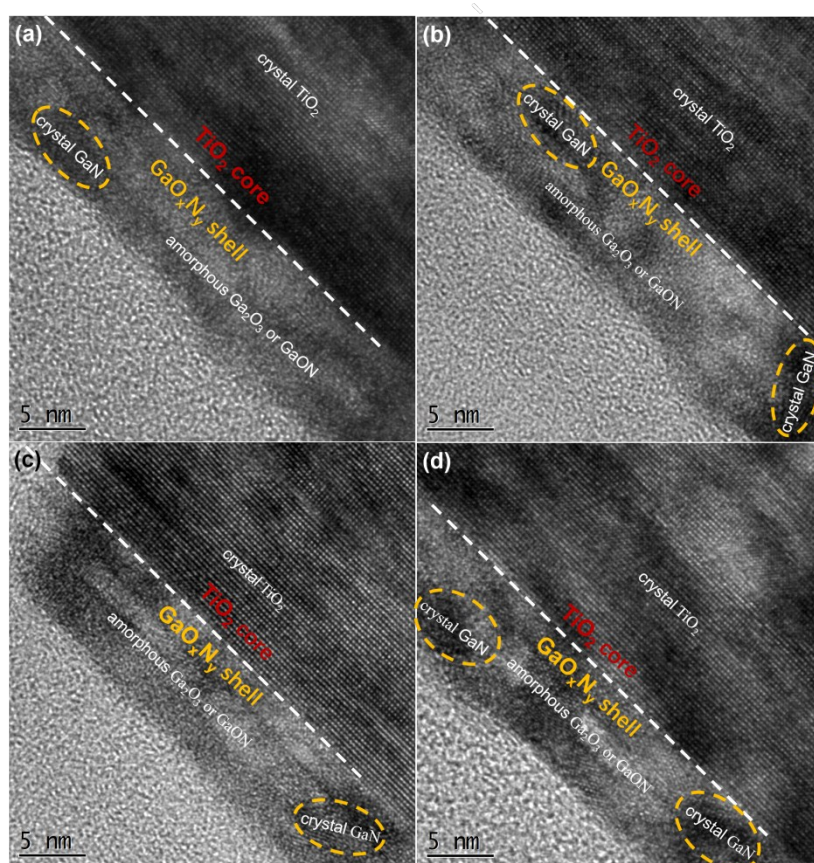

**Fig. S3** HRTEM image of TG10 with different area.

The HRTEM image of the TG10 as shown in Fig. S3 indicates a poor crystallinity of  $\text{GaO}_x\text{N}_y$  shell. This is used to prove that the content of GaN crystal in  $\text{GaO}_x\text{N}_y$  is very small, and most of them are amorphous  $\text{Ga}_2\text{O}_3$  and GaON.

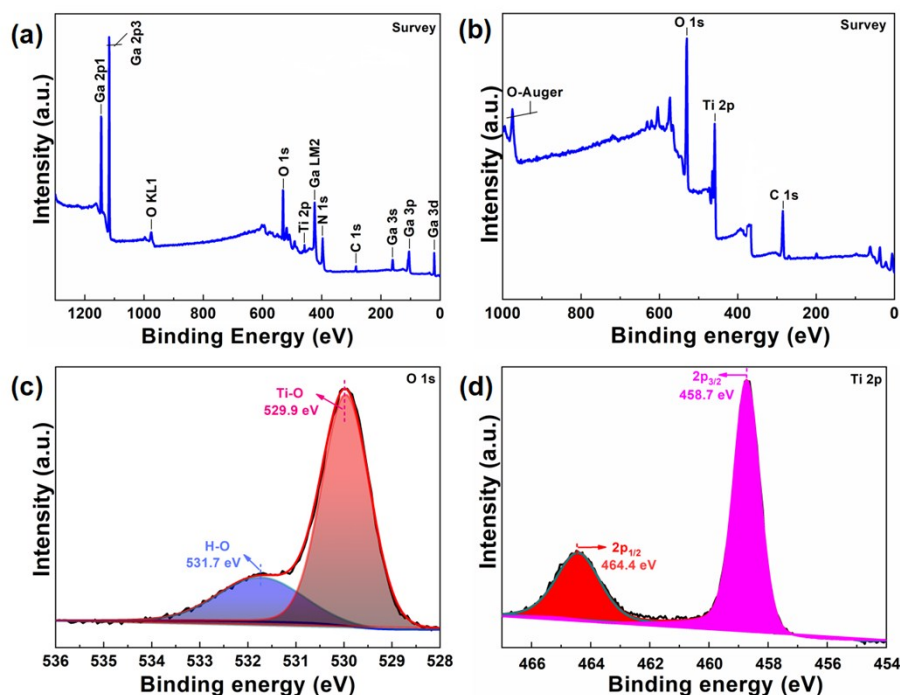

**Fig. S4** XPS survey spectrum of (a) TG5, (b)  $\text{TiO}_2$ , and (c) high-resolution curve of O 1s, (d) high-resolution curve of Ti 2p.

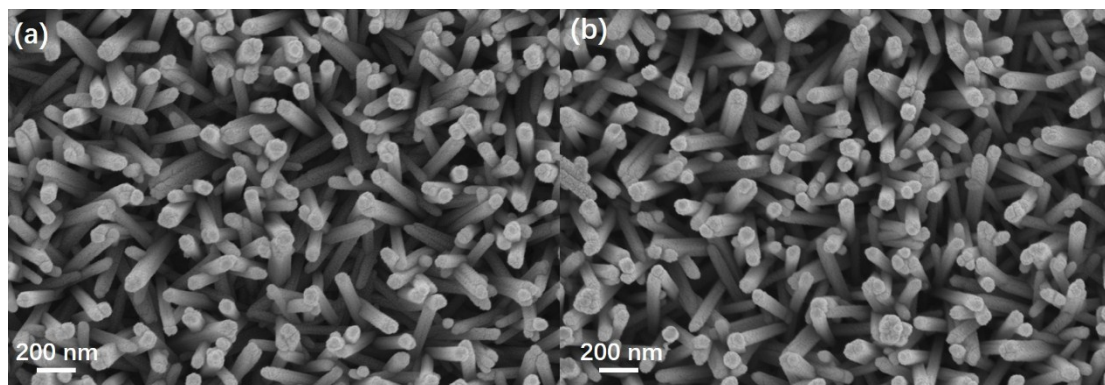

**Fig. S5** The SEM image of TG20 (a) before and (b) after PEC measurements.

The SEM images of TG20 before and after PEC measurement in Fig.S5 shows no noticeable degradation of the TG20 NWs. The results also reveal that TG20 has excellent structural stability and photoelectric durability for PEC water splitting.

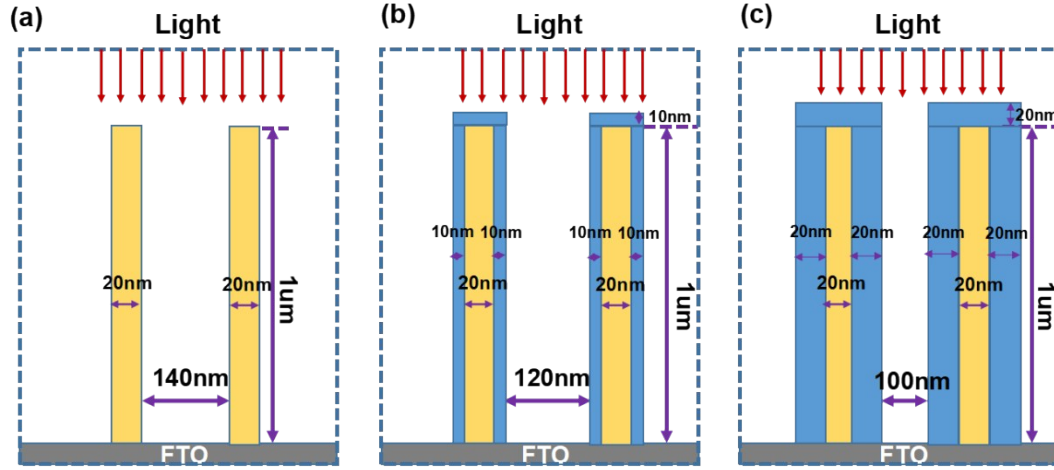

**Fig.S6** Schematics of the FDTD simulation models of (a)  $\text{TiO}_2$ , (b) TG10, and (c) TG20, respectively.

The simulation models of  $\text{TiO}_2$  and TG NWs structure are illustrated in Fig. S6. It contains  $\text{TiO}_2$  NWs with length and width of  $1\ \mu\text{m}$  and  $20\ \text{nm}$ , and  $\text{GaO}_x\text{N}_y$  film with thickness of  $10$  and  $20\ \text{nm}$ .

## Supplementary Tables

**Table S1** Parameters deduced from photoelectrochemical studies for the TiO<sub>2</sub> and TG NWs.

| Samples              | Sample details                               | R <sub>ct</sub> ( $\Omega$ cm <sup>-2</sup> ) | Photocurrent density (mA cm <sup>-2</sup> ) | IPCE(%)      |
|----------------------|----------------------------------------------|-----------------------------------------------|---------------------------------------------|--------------|
|                      |                                              |                                               | at 1.23 V vs RHE                            | at 380 nm    |
| TiO <sub>2</sub> NWs | TiO <sub>2</sub> Nanowires                   | 34.56                                         | 0.08                                        | 30.44        |
| TG5                  | 5 nm-GaON/ TiO <sub>2</sub> Nanowires        | 30.05                                         | 0.17                                        | -            |
| TG10                 | 10 nm-GaON/ TiO <sub>2</sub> Nanowires       | 26.28                                         | 0.36                                        | -            |
| TG15                 | 15 nm-GaON/ TiO <sub>2</sub> Nanowires       | 23.54                                         | 0.63                                        | -            |
| <b>TG20</b>          | <b>20 nm-GaON/ TiO<sub>2</sub> Nanowires</b> | <b>21.20</b>                                  | <b>1.10</b>                                 | <b>92.08</b> |
| TG25                 | 25 nm-GaON/ TiO <sub>2</sub> Nanowires       | 20.32                                         | 1.02                                        | -            |
